# Supplementary material for: Breaking bad news: A mix methods study reporting the need for improving communication skills among doctors in Pakistan
Source: Springer Nature journal article supplement (doi:10.1186/s12913-024-11056-2), 2024-05-06
Supplement: MOESM1 [file 27061210]

# SPIKES protocol for breaking bad news

*The following summary is adapted from:*

- Baile, W. et al. SPIKES – A six step protocol for delivering bad news: application to the patient with cancer. *The Oncologist* 2000; 5:302-311.
- Buckman, R. Breaking bad news: the S-P-I-K-E-S strategy. *Community Oncology* 2005; 2: 183-142.

## The SPIKES protocol for breaking bad news has four objectives:

- Gathering information from the patient
- Transmitting the medical information
- Providing support to the patient
- Eliciting patient's collaboration in developing a strategy or treatment for the future.

## Strategy for breaking bad news

Meeting the above goals can be accomplished by completing six tasks, each of which is associated with specific skills.

### Six Steps of SPIKES:

#### **S – Setting**

- Arrange for some privacy
- Involve significant others
- Sit down
- Make connection and establish rapport with the patient
- Manage time constraints and interruptions.

#### **P – Perception of condition/seriousness**

- Determine what the patient knows about the medical condition or what he suspects.
- Listen to the patient's level of comprehension
- Accept denial but do not confront at this stage.

#### **I – Invitation from the patient to give information**

- Ask patient if s/he wishes to know the details of the medical condition and/or treatment
- Accept patient's right not to know
- Offer to answer questions later if s/he wishes.

#### **K – Knowledge: giving medical facts**

- Use language intelligible to patient
- Consider educational level, socio-cultural background, current emotional state
- Give information in small chunks
- Check whether the patient understood what you said

- Respond to the patient's reactions as they occur
- Give any positive aspects first  
e.g.: Cancer has not spread to lymph nodes, highly responsive to therapy, treatment available locally etc.
- Give facts accurately about treatment options, prognosis, costs etc.

#### **E - Explore emotions and sympathize**

- Prepare to give an empathetic response:
  1. Identify emotion expressed by the patient (sadness, silence, shock etc.)
  2. Identify cause/source of emotion
  3. Give the patient time express his or her feelings, then respond in a way that demonstrates you have recognized connection between 1 and 2.

#### **S – Strategy and summary**

- Close the interview
- Ask whether they want to clarify something else
- Offer agenda for the next meeting  
eg: I will speak to you again when we have the opinion of cancer specialist.
